# Supplementary material for: Nf1 mutation disrupts activity-dependent oligodendroglial plasticity and motor learning in mice
Source: PubMed Central journal article supplement (PMC11303248; doi:10.1038/s41593-024-01654-y), 2024-05-30

Fig. 4h

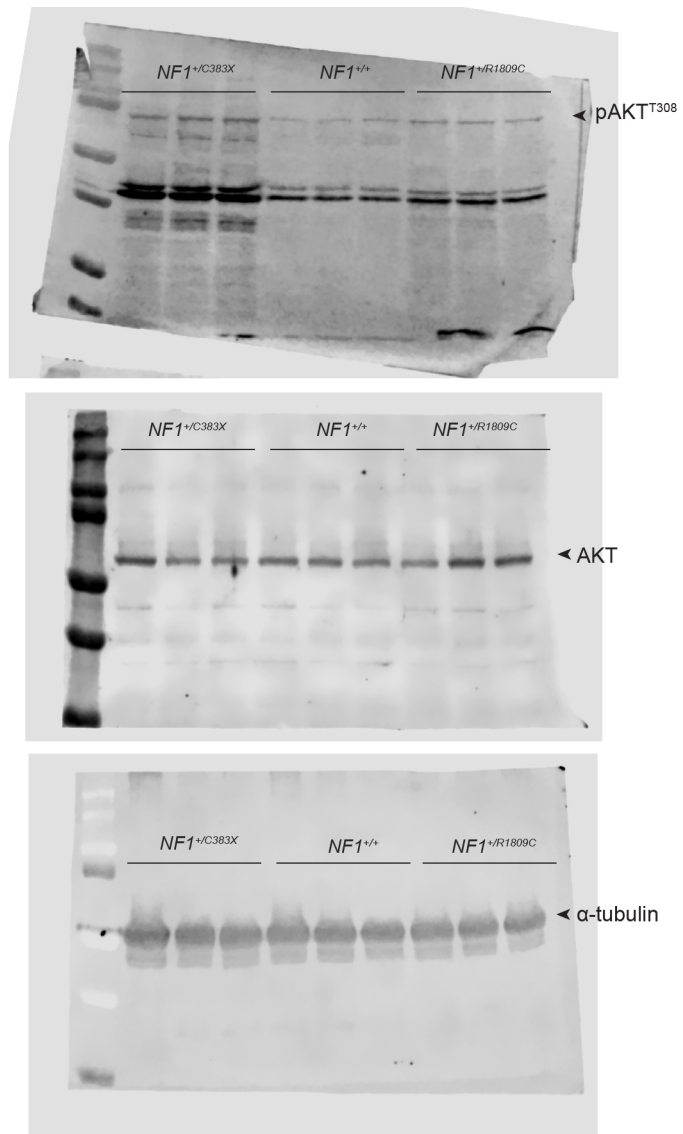

Supplement: 41593_2024_1654_MOESM4_ESM.pdf [file 41593_2024_1654_MOESM4_ESM.pdf]
